# Supplementary material
Source: Research Square preprint supplement (doi:10.21203/rs.3.rs-9168381/v1)
Supplement: Supplementary file 1 [file db1593041fa1b689936c02aa.docx]

Questionnaire:

**DETERMINANTS OF MINIMUM ACCEPTABLE DIET AMONG CHILDREN AGED 6-23 MONTHS IN EASTERN WARD BUHOMA TOWN COUNCIL KANUNGU DISTRICT.**

| **Section 0: Introduction and Consent** |
| --- |
| **Introduction/Purpose:**  My name is___________ and I’m working for the _______. We are conducting an assessment about the nutritional and health behaviors of children 6-23 months of age. We would very much appreciate your participation in this survey since you are a mother or primary caretaker of a child aged 6- 23 months, living in Buhoma Town Council, Kanungu District.  **Procedures:**  If you agree to take part in this study, I would like to ask you about your health and nutritional behaviors and those decisions you might make for your children. This information will help us to plan better child health and nutritional services. The questionnaire usually takes between 45-60 minutes to complete. Additionally, we would like to take length/height and weight measurements of yourself and the child about whom you answer the survey questions. This information will allow us to assess the health, nutritional status, and food consumption patterns of mothers and children in the area. If you accept, we will take two measurements of length/height and two measurements of weight, to ensure the information is consistent and correct. Further, my field supervisor may visit your household and ask you few questions in order to countercheck the information I collected from you.  **Risks:**  We believe there are no risks to you or your child from participating in this study. Your child should not experience any discomfort whatsoever.  **Benefits:**  Taking part in this research study may not benefit you personally, but we may learn new things that will help the community.  **Compensation**  You will not be paid for participating in this study.  **Confidentiality:**  We will keep your answers confidential to the best of our ability. We will not share your answers with any of your neighbors or family. We will use a number instead of your name on study forms. Your name and other facts that might help people recognize you will not appear when we present this study to others or publish its results. Any information that might identify you will be kept separate from your answers, and your answers will be kept in a secure place for analyses by the researchers only.  **Voluntary Participation and Withdrawal:**  Taking part in this study is voluntary. You can choose not to talk to us or ask us to leave, and if you do agree to participate you can stop the interview at any time or skip any questions that you don’t want to answer. There is no right or wrong answers. We just want to hear more about your own ideas and experiences. After finishing the interview, you can refuse to have your answers included in the study.  **Contact Persons:**   - If you have any questions, I will be happy to answer them. And in case you ever want to contact someone from the office we work for, I can write down the telephone number for the Principal Investigator. You should call this number and ask for Dr. Gaston Ampe: 0703790420   Do you have any questions about the survey? Do you have any questions about the measurements we will take of your child? Please let me know if anything I have stated is not clear and I will be happy to explain it further to ensure you understand.  ***___________________________ ___________ __________***  *Signature of witness (only if participant is illiterate) Date Time*  Do you accept participating in this study?  Yes_______ No__________  VERBAL CONSENT GIVEN TO INTERVIEW, CHECK BOX  *_____________________________ ___________ __________*  *Signature of Person obtaining consent Date Time* |

**SOCIAL- DEMOGRAPHIC AND ECONOMIC CHARACTERISTICS**

(Circle the correct option for multiple choice questions)

**Child characteristics**

1. What is the age category of the child?

A 6-8 months B 9-23 months

2. What is the sex of the child?

A Male B Female

3. What is the birth order of the child?

A First B Second

B Third and above

4. Was the child initiated of breast feeding in the first hour after birth?

A Yes B No

5. Was there any pre-lacteal feeds given to the child?

A Yes B No

6. Is the child breast?

A Yes B No

**Maternal or care giver’s characteristics**

7. To which of the age categories do you belong?

A 15-20 years B 20-35 years

C 36-50 years D 51 years and above

8. what is your marital status?

A Married B Single C Divorced

9. Which one of the following is your average earning per week?

A < UGX 30000Shs B UGX 30000-100000Shs

C UGX 100000-200000Shs D UGX >200000Shs

10. Which one of the following is your level of education?

A Never gone to school B Primary

C Secondary C Tertially and above

11. Which of the following describes your work status

A Working B Not working

12. Did you receive any counselling on nutrition or infant and young child feeding?

A Yes B No

**Household characteristics**

13. Household food security

Each of the questions in the following table is asked with a recall period of four weeks (30 days). The respondent is first asked an occurrence question i.e. Whether the condition in the question happened at all in the past four weeks (yes or no). If the respondent answers “yes” to an occurrence question, a frequency of occurrence question is asked to determine whether the condition happened rarely (once or twice), sometimes (three to ten times) or often (more than ten times) in the past four weeks.

For example

How often did this happen?

1 = rarely (once or twice in the past four weeks)

2 = Sometimes (three to ten times in the past four weeks)

3 = Often (more than ten times in the past four weeks)

| **No** | **Question** | **Response** | **Occurrence** |
| --- | --- | --- | --- |
| 1 | In the past four weeks, did you worry that your household would not have enough food? |  |  |
| 2 | In the past four weeks, were you or any household member not able to eat the kinds of foods you preferred because of a lack of resources? |  |  |
| 3 | In the past four weeks, did you or any household member have to eat a limited variety of foods due to a lack of resources? |  |  |
| 4 | In the past four weeks, did you or any household member have to eat some foods that you really did not want to eat because of a lack of resources to obtain other types of food? |  |  |
| 5 | In the past four weeks, did you or any household member have to eat a smaller meal than you felt you needed because there was not enough food? |  |  |
| 6 | In the past four weeks, did you or any household member have to eat fewer meals in a day because there was not enough food? |  |  |
| 7 | In the past four weeks, was there ever no food to eat of any kind in your household because of lack of resources to get food? |  |  |
| 8 | In the past four weeks, did you or any household member go to sleep at night hungry because there was not enough food? |  |  |
| 9 | In the past four weeks, did you or any household member go a whole day and night without eating anything because there was not enough food? |  |  |

14 How many members are in the family?

A 1-2 B 3-5 C >5

15 What kind of family do you belong to?

A Single mother or father B Nuclear C Extended

**NUTRITION KNOWLEDGE, ATTITUDES AND PRACTICES**

(Put Yes or No against each of the following statements).

| **Question/Statement** | **Response** |
| --- | --- |
| The ﬁrst food for a newborn is breast milk only |  |
| Breastfeeding should be initiated within 1 hour after birth |  |
| A child under 6 months old should be breastfed on demand |  |
| Expressed Breast milk should be fed to a child in the absence of the mother |  |
| Cessation of breastfeeding is at 2 years |  |
| A child should be breastfed on-demand after weaning |  |
| A child could be weaned at 6 months of age |  |
| A child between 6 and 8 months old should be fed at least twice a day |  |
| A child between 9 and 23 months old should be fed three or more times a day |  |
| There are 8 food groups a child’s meal should be planned with |  |
| Are you aware of the signs of Iron-Deﬁciency Anemia? |  |
| Are you aware of the causes of anemia? |  |
| The best way to feed complementary foods is by using a cup/plate and spoon. |  |

**FOOD CONSUMPTION PATTERNS**

**24 hour recall**

| Time | Serving size | Meals | How prepared: | Where: | Note: |
| --- | --- | --- | --- | --- | --- |
|  |  | Breakfast |  |  |  |
|  |  |  |  |  |  |
|  |  |  |  |  |  |
|  |  | Snack |  |  |  |
|  |  |  |  |  |  |
|  |  | Lunch |  |  |  |
|  |  |  |  |  |  |
|  |  | Snack |  |  |  |
|  |  |  |  |  |  |
|  |  | Dinner |  |  |  |
|  |  |  |  |  |  |
|  |  | Breakfast |  |  |  |
|  |  |  |  |  |  |
|  |  |  |  |  |  |
|  |  | Snack |  |  |  |
|  |  |  |  |  |  |
|  |  | Lunch |  |  |  |
|  |  |  |  |  |  |
|  |  | Snack |  |  |  |
|  |  |  |  |  |  |
|  |  | Dinner |  |  |  |
|  |  |  |  |  |  |

.

Thank you for participating
